# Supplementary material for: Automated In‐Line Artificial Intelligence Measured Global Longitudinal Shortening and Mitral Annular Plane Systolic Excursion: Reproducibility and Prognostic Significance
Source: PubMed Central journal article supplement — J Am Heart Assoc. 2022 Feb 8;11(4):e023849. doi: 10.1161/JAHA.121.023849 (PMC9245823; doi:10.1161/jaha.121.023849), 2022-02-08
Supplement: JAH3-11-e023849-s002.pdf [file JAH3-11-e023849-s002.pdf]

# **SUPPLEMENTAL MATERIAL**

**Table S1. Pearson Correlation Coefficients of AI MAPSE, GL-Shortening, GL-Strain, EF, EDV, ESV, and LGE mass.**

|               | MAPSE | GL-Shortening   | GL-Strain       | EF              | EDV              | ESV              | LGE mass         |
|---------------|-------|-----------------|-----------------|-----------------|------------------|------------------|------------------|
| MAPSE         | -     | 0.84<br>P<.0001 | 0.79<br>P<.0001 | 0.68<br>P<.0001 | -0.28<br>P<.0001 | -0.52<br>P<.0001 | -0.36<br><.0001  |
| GL-Shortening | -     | -               | 0.92<br>P<.0001 | 0.83<br>P<.0001 | -0.56<br>P<.0001 | -0.73<br>P<.0001 | -0.47<br>P<.0001 |
| GL-Strain     | -     | -               | -               | 0.85<br>P<.0001 | -0.57<br>P<.0001 | -0.74<br>P<.0001 | -0.45<br>P<.0001 |
| EF            | -     | -               | -               | -               | -0.66<br>P<.0001 | -0.86<br>P<.0001 | -0.50<br>P<.0001 |

**Table S2. Summary of the net reclassification index (NRI) and the integrated discriminant improvement (IDI) analysis for MAPSE and GL-shortening against EF and GL-Strain.** With the addition of MAPSE or GL-shortening to univariable Cox regression models with either EF or GL-Strain, NRI and IDI parameters were all significant for except for when GL-shortening was compared to GL-Strain, which may relate to their correlation (R=0.79, p<0.001). Fully adjusted multivariable models yielded significant continuous NRI parameters, but not categorical NRI or IDI parameters.

|                                    | Univariable                 |                                        |                                        |         | Multivariable*      |                                        |                                        |         |
|------------------------------------|-----------------------------|----------------------------------------|----------------------------------------|---------|---------------------|----------------------------------------|----------------------------------------|---------|
|                                    | type                        | NRI                                    | NRI Percentile method 95% Bootstrap CI | P-value | type                | NRI                                    | NRI Percentile method 95% Bootstrap CI | P-value |
| <b>MAPSE vs. EF</b>                | Continuous NRI              | 0.4377                                 | (0.2949, 0.5727)                       | <.001   | Continuous NRI(>0)  | 0.3228                                 | (0.1818, 0.4275)                       | <.001   |
| <b>MAPSE vs. EF</b>                | Categorical NRI (0.05 0.35) | 0.1735                                 | (0.1172, 0.2412)                       | <.001   | User NRI(0.05 0.35) | 0.0225                                 | (-0.0223, 0.0655)                      | 0.38    |
| <b>GL-Shorting vs. EF</b>          | Continuous NRI              | 0.4389                                 | (0.3284, 0.5557)                       | <.001   | Continuous NRI(>0)  | 0.2504                                 | (0.1091, 0.3539)                       | <.001   |
| <b>GL-Shorting vs. EF</b>          | Categorical NRI (0.05 0.35) | 0.0752                                 | (0.0151, 0.1189)                       | <.001   | User NRI(0.05 0.35) | -0.0061                                | (-0.04, 0.025)                         | 0.7     |
| <b>MAPSE vs. GL-Strain</b>         | Continuous NRI              | 0.3272                                 | (0.174, 0.4977)                        | <.001   | Continuous NRI(>0)  | 0.2568                                 | (0.1353, 0.4145)                       | <.001   |
| <b>MAPSE vs. GL-Strain</b>         | Categorical NRI (0.05 0.35) | 0.1212                                 | (0.0627, 0.1739)                       | <.01    | User NRI(0.05 0.35) | 0.0325                                 | (-0.0283, 0.0812)                      | 0.24    |
| <b>GL-Shortening vs. GL-Strain</b> | Continuous NRI(>0)          | 0.1813                                 | (0.038, 0.3242)                        | 0.00    | Continuous NRI(>0)  | 0.1953                                 | (0.0848, 0.3205)                       | <.001   |
| <b>GL-Shortening vs. GL-Strain</b> | User NRI(0.05 0.35)         | 0.0179                                 | (-0.0209, 0.0464)                      | 0.32    | User NRI(0.05 0.35) | -0.0041                                | (-0.0297, 0.0216)                      | 0.8     |
|                                    |                             |                                        |                                        |         |                     |                                        |                                        |         |
|                                    | IDI                         | IDI Percentile method 95% Bootstrap CI | P-value                                |         | IDI                 | IDI Percentile method 95% Bootstrap CI | P-value                                |         |
| <b>MAPSE vs. EF</b>                | 0.0123                      | (0.0096, 0.016)                        | <.001                                  |         | .0059               | (0.0007, 0.0105)                       | 0.02                                   |         |
| <b>GL-Shorting vs. EF</b>          | .0056                       | (0.004, 0.0074)                        | <.001                                  |         | .0016               | (-0.0013, 0.0049)                      | 0.28                                   |         |
| <b>MAPSE vs. GL-Strain</b>         | .0073                       | (0.0053, 0.0098)                       | <.001                                  |         | .003                | (-0.0017, 0.0062)                      | 0.2                                    |         |
| <b>GL-Shortening vs. GL-Strain</b> | .001                        | (0.0002, 0.0017)                       | 0.02                                   |         | -.0003              | (-0.0019, 0.0009)                      | 0.76                                   |         |

\*adjusted for age, sex, white race, diabetes, hypertension, current or prior smoking, hyperlipidemia, glomerular filtration, percutaneous coronary intervention, coronary artery bypass surgery, atrial fibrillation, moderate or severe mitral regurgitation, moderate or severe aortic stenosis, left ventricular mass index, end diastolic volume index, myocardial infarction on LGE, nonischemic myocardial scar on LGE, and extracellular volume (ECV).

**Figure S1. Multi-variable Cox modeled curves for outcomes for GLS, GL-Shortening and MAPSE. These results are for HHF or death.**

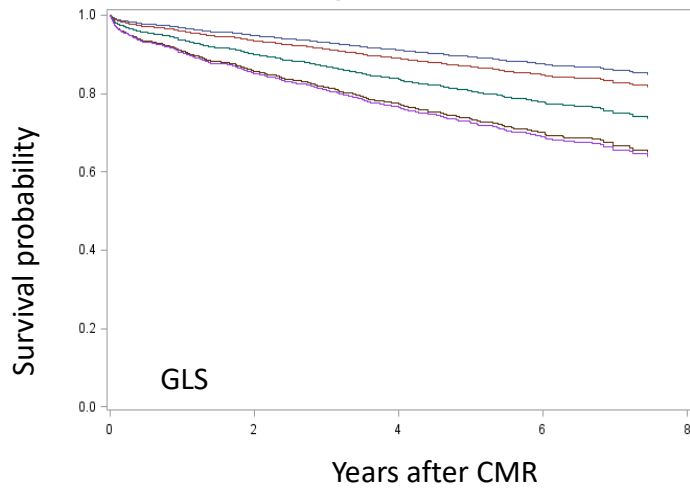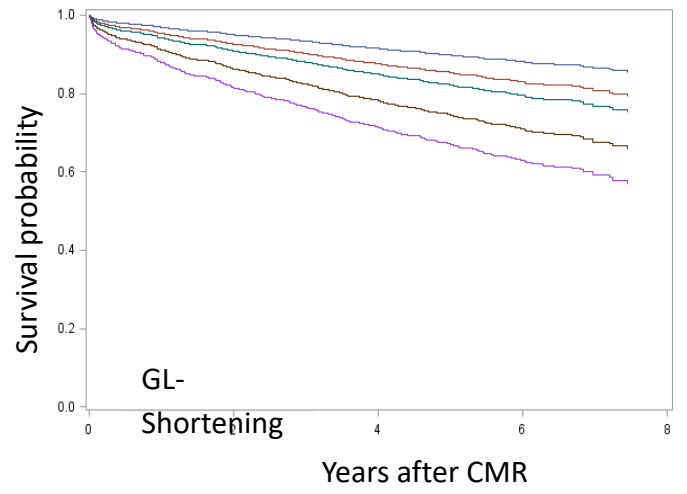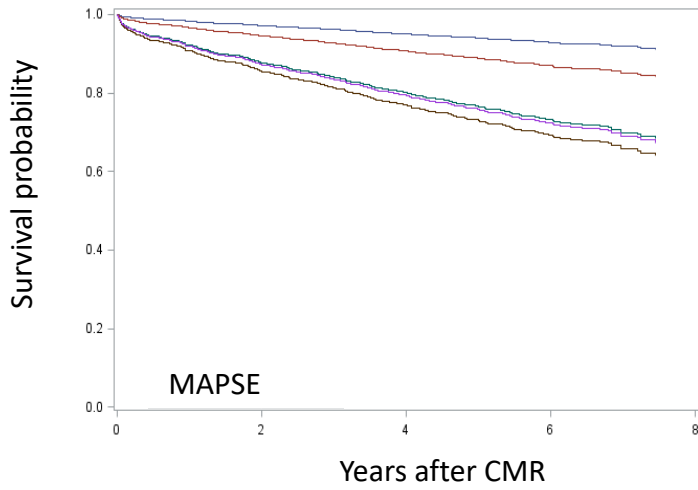

**Figure S2. Examples of landmark detection for a patient with the hypertrophic cardiomyopathy.** This is a male patient, 45 years old, with elevated LV mass (396g) and reduced cardiac function. The AI model correctly detected the landmark points on (a) CH2, (b) CH4, and (c) CH3 cine views, for both end-diastolic (left column) and end-systolic (right column) phases. The AI derived GL-Shortening is 3.02%, consistent with impaired contractibility.

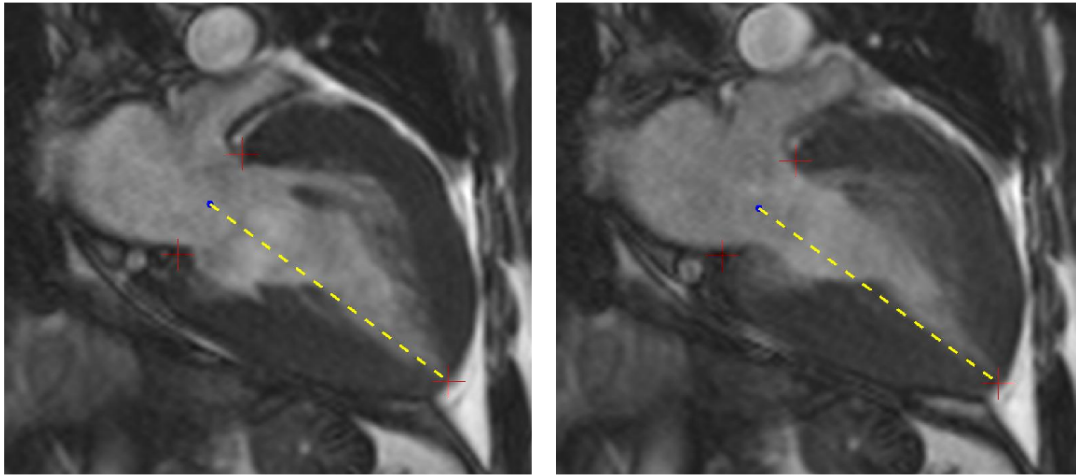

(a) CH2, ES and ED phases

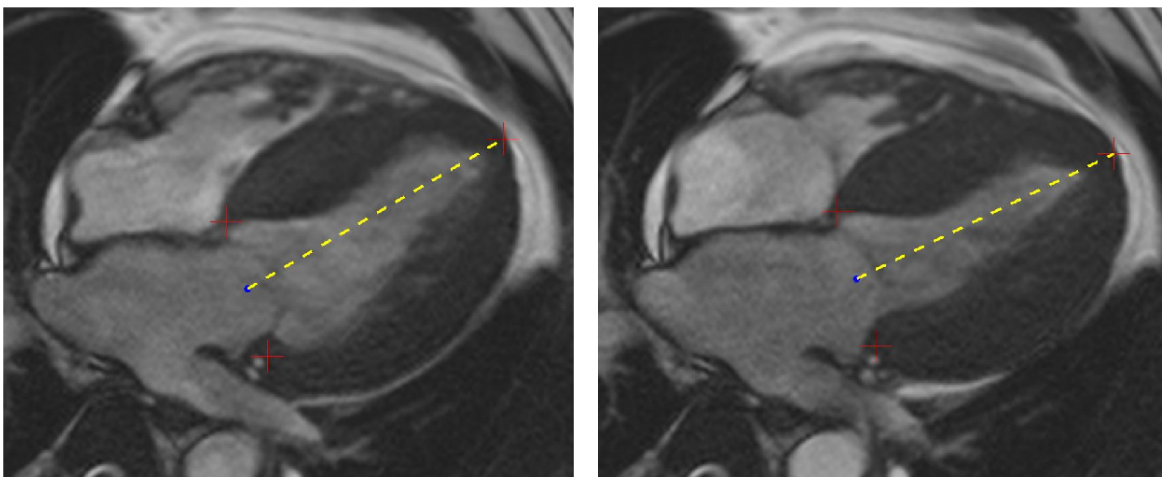

(b) CH4, ES and ED phases

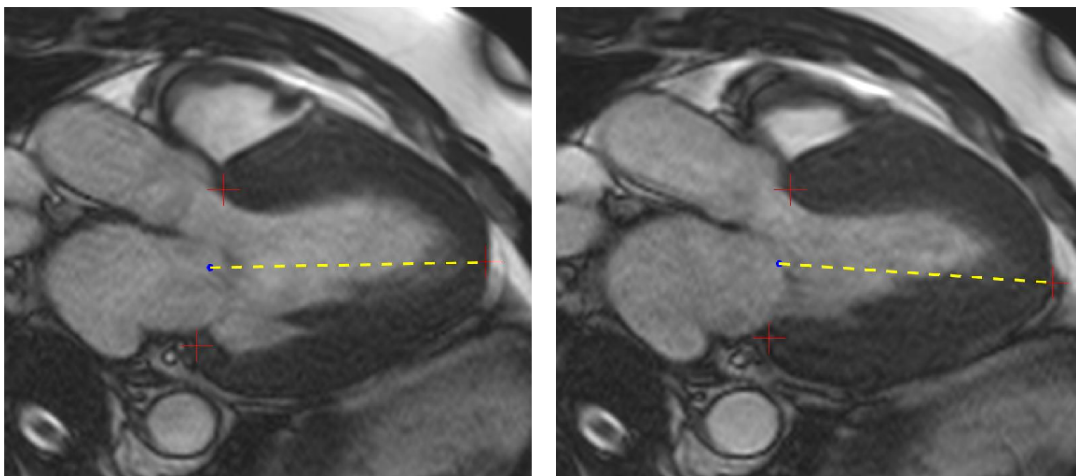

(c) CH3, ES and ED phases

## **Supplemental Video Legends:**

**Video S1. Examples of AI based landmark detection from long-axis CH2 images.**

**Video S2. Examples of AI based landmark detection from long-axis CH3 images.**

**Video S3. Examples of AI based landmark detection from long-axis CH4 images.**

**Video S4. Illustration of cine acquisition, image reconstruction, and inline processing to report AI GL-Shortening and MAPSE on the MR scanner.** Output image series include the raw cine images, the cine images with landmarks, summary report and plots which include LV length and LV shortening vs cardiac phase, longitudinal shortening velocity for septal and lateral wall, and measurement of mitral annular valve diameter at ES and ED.
